# Supplementary material for: 3D human liver tissue from pluripotent stem cells displays stable phenotype in vitro and supports compromised liver function in vivo
Source: Springer Nature journal article supplement (doi:10.1007/s00204-018-2280-2), 2018-08-27
Supplement: MOESM2 [file 204_2018_2280_MOESM2_ESM.pdf]

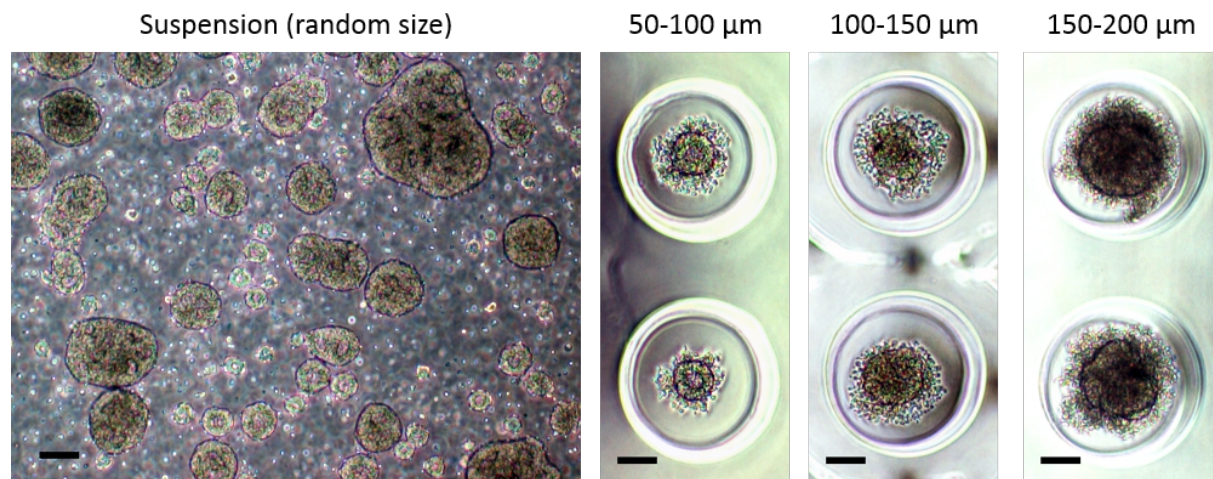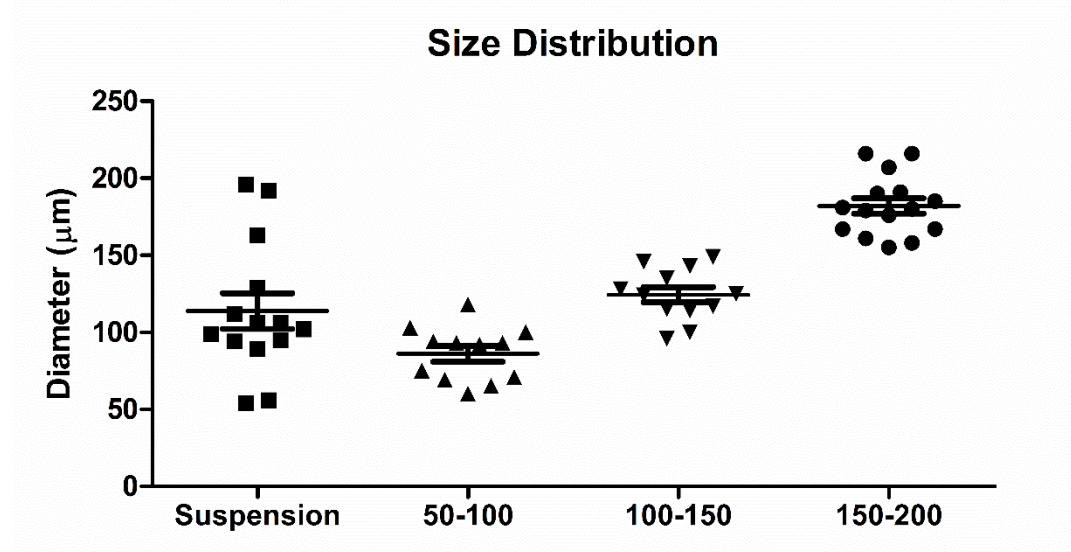

**Supplementary figure 1: Generation of 3D Heps.** Self-aggregation in suspension culture resulted in spheroids heterogeneous in size while the initial size of spheroids can be controlled by alteration of seeding density in agarose microplate platform.

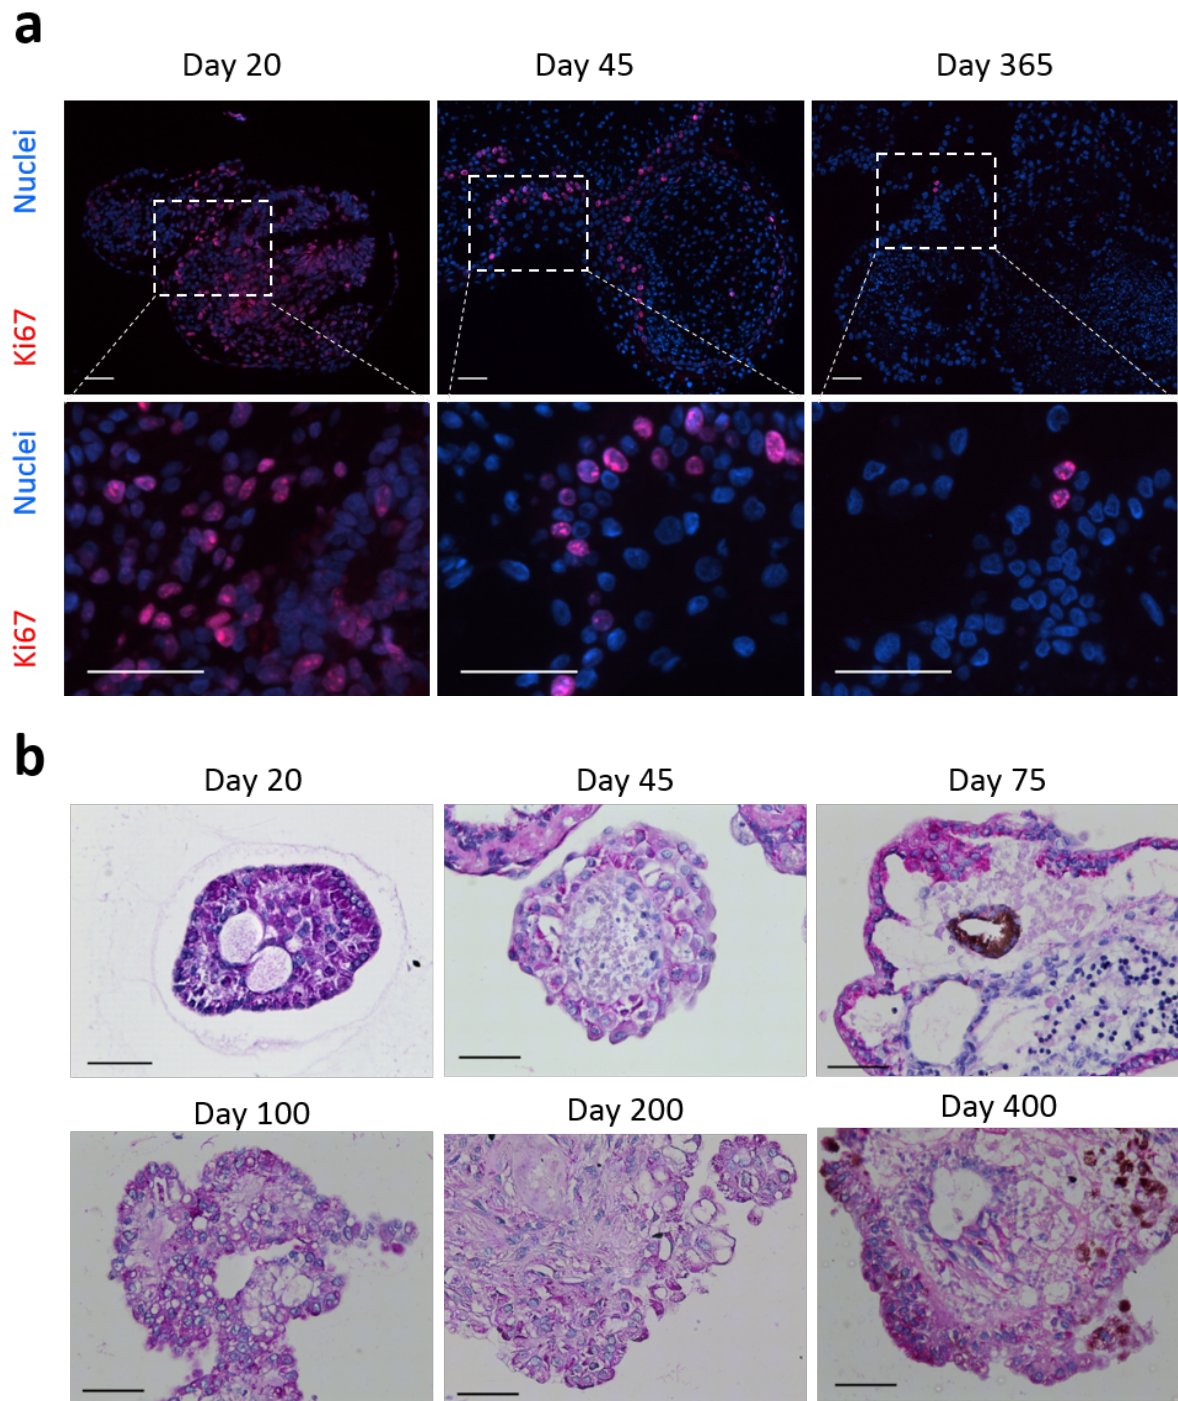

**Supplementary figure 2: 3D HepS characterisation. (a)** The number of proliferative cells reduced by elongation of differentiation. **(b)** Glycogen storage in 3D HepS.

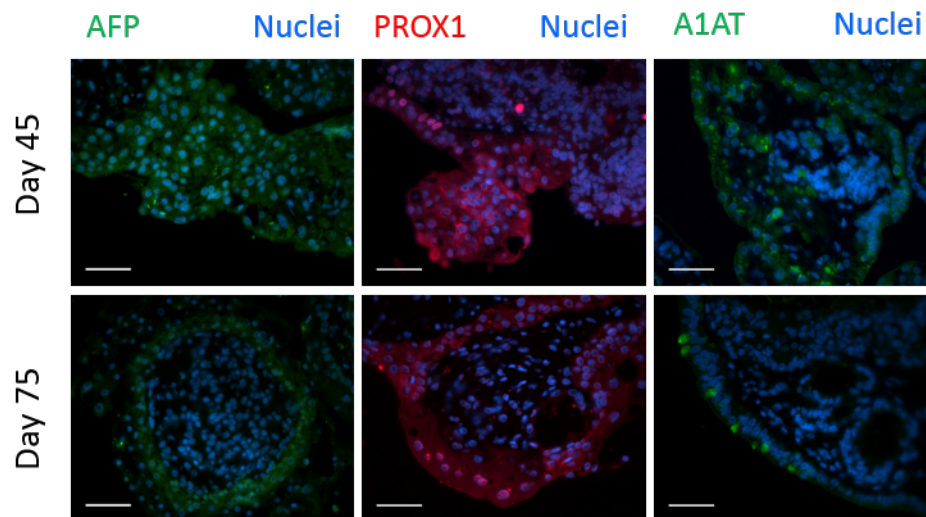

**Supplementary figure 3: Expression of hepatic markers.** (a) AFP expression at d45 and d75. (b) Expression of PROX1 at d45 and d75. (b) Expression of A1AT at d45 and d75. Scale bar 50  $\mu$ m.



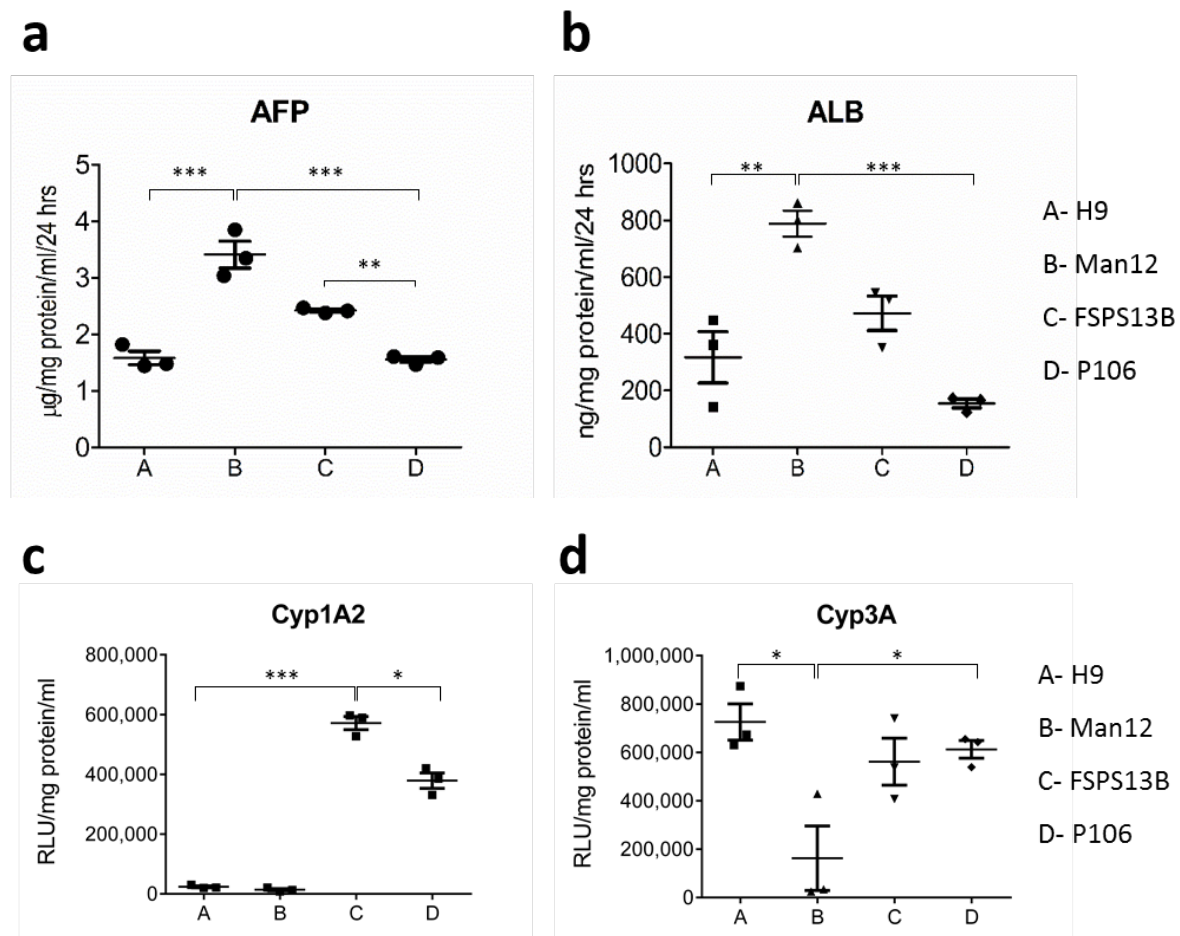

**Supplementary Figure 4: Functional analysis of 3D Heps generated from two ESC lines (H9 & Man12) and two integration-free iPSC lines (FSPS13B & P106). (a) Secretion of AFP and (b) ALB by PSC derived 3D Heps in 24 hrs. (c) Cyp1A2 and (d) Cyp3A activity detected in PSC derived 3D Heps. n= 3 per group, significance was determined One-way ANOVA Tukey post hoc test. Data are represented as mean  $\pm$  SEM, \* =  $p < 0.05$ , \*\* =  $p < 0.01$ , \*\*\* =  $p < 0.001$ .**

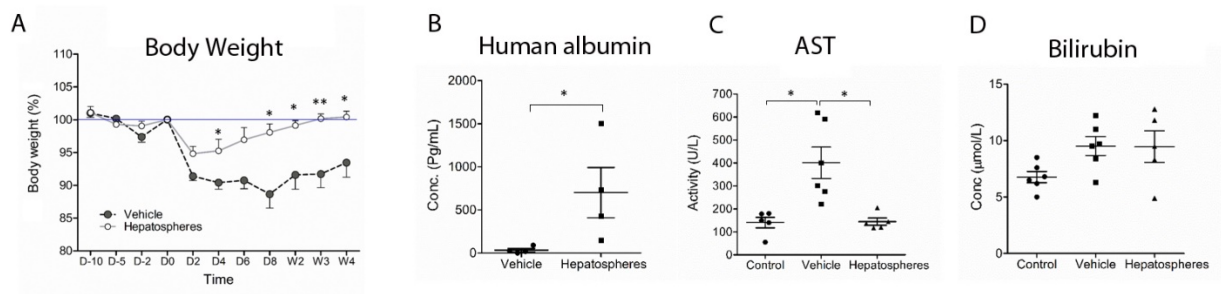

**Supplementary Figure 5: Stem cell derived hepatocytes provide liver support following 50% partial hepatectomy in immunocompromised mice.**

**(a)** Percentage of body weight change 4 weeks after 50% PHx. Mice weights were measured 10 days before cell transplantation up to 4 weeks post transplantation. **(b)** Human albumin levels in mouse serum after 4 weeks of receiving vehicle or cells, assayed by MSD System. **(c)** Hepatocellular damage markers, aspartate transaminase activity in serum, and **(d)** Serum bilirubin levels after 4 week of 50% PHx.  $n = 3-7$  per group, significance was determined One-way ANOVA Tukey post hoc or by Mann Whitney test, as suitable. Data are represented as mean  $\pm$  SEM, \* =  $p < 0.05$ , \*\* =  $p < 0.01$ .
